# Supplementary material for: What are patients’ expectations of orthodontic treatment: a systematic review
Source: PubMed Central journal article supplement (PMC4756524; doi:10.1186/s12903-016-0182-3), 2016-02-17
Supplement: 12903_2016_182_MOESM1_ESM.pdf [file 12903_2016_182_MOESM1_ESM.pdf]

## Search Strategy:

#1=expectation;

#2=patient expectation;

#3=expectation satisfaction;

#4=health expectation;

#5=treatment expectation;

#6=expectation outcome;

#7=patient expectations satisfaction;

#8=expectant;

#9=expected value;

#10=expected;

#11=outcome expectations

#12=#1 OR #2 OR #3 OR #4 OR #5 OR #6 OR #7 OR #8 OR #9 OR #10 OR #11

#13=anticipation

#14=#12 OR #13

#15=orthodontic treatment

#16=malocclusion

#17=malocclusion orthodontic

#18=malocclusion treatment

#19=dental malocclusion

#20=#15 OR #16 OR #17 OR #18 OR #19

#21=#20 AND #14
